# Supplementary material
Source: ML conference proceedings conference paper supplement (https://openreview.net/forum?id=974ojuN0jU)

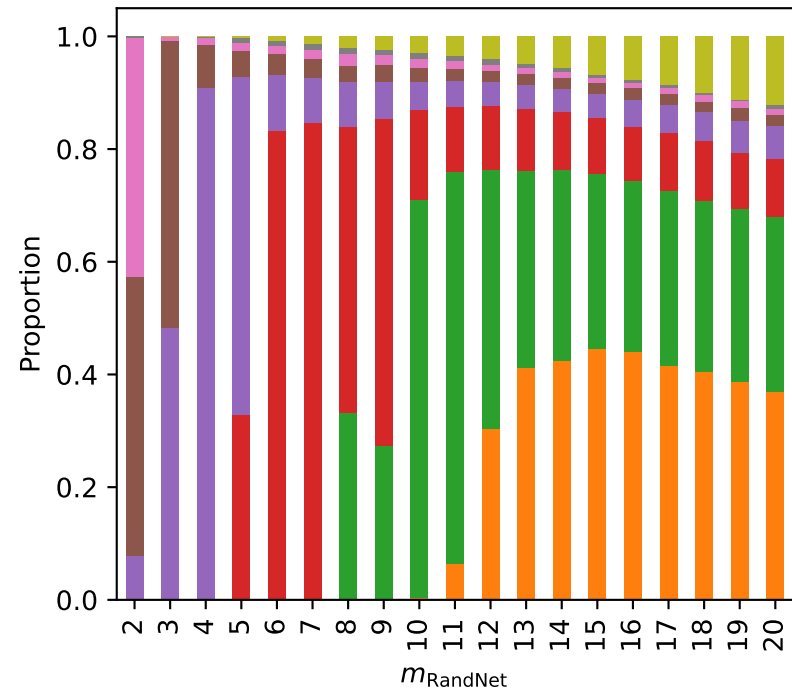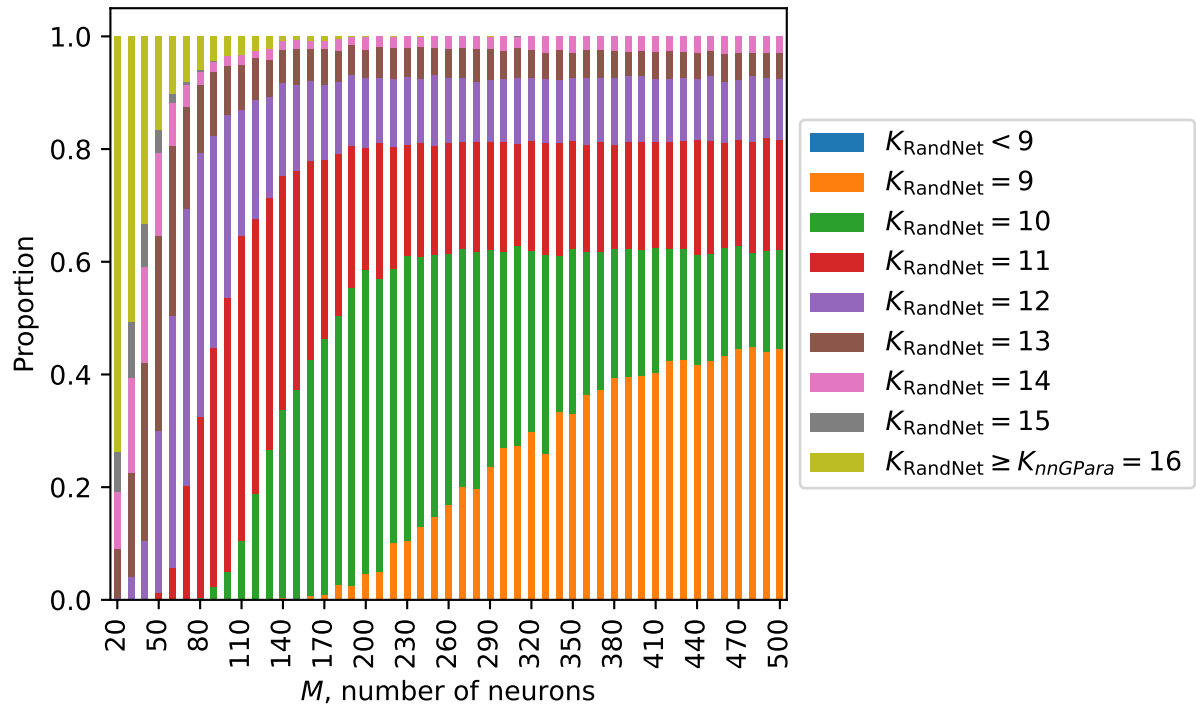

Supplement: supplementary_material [file attachment]

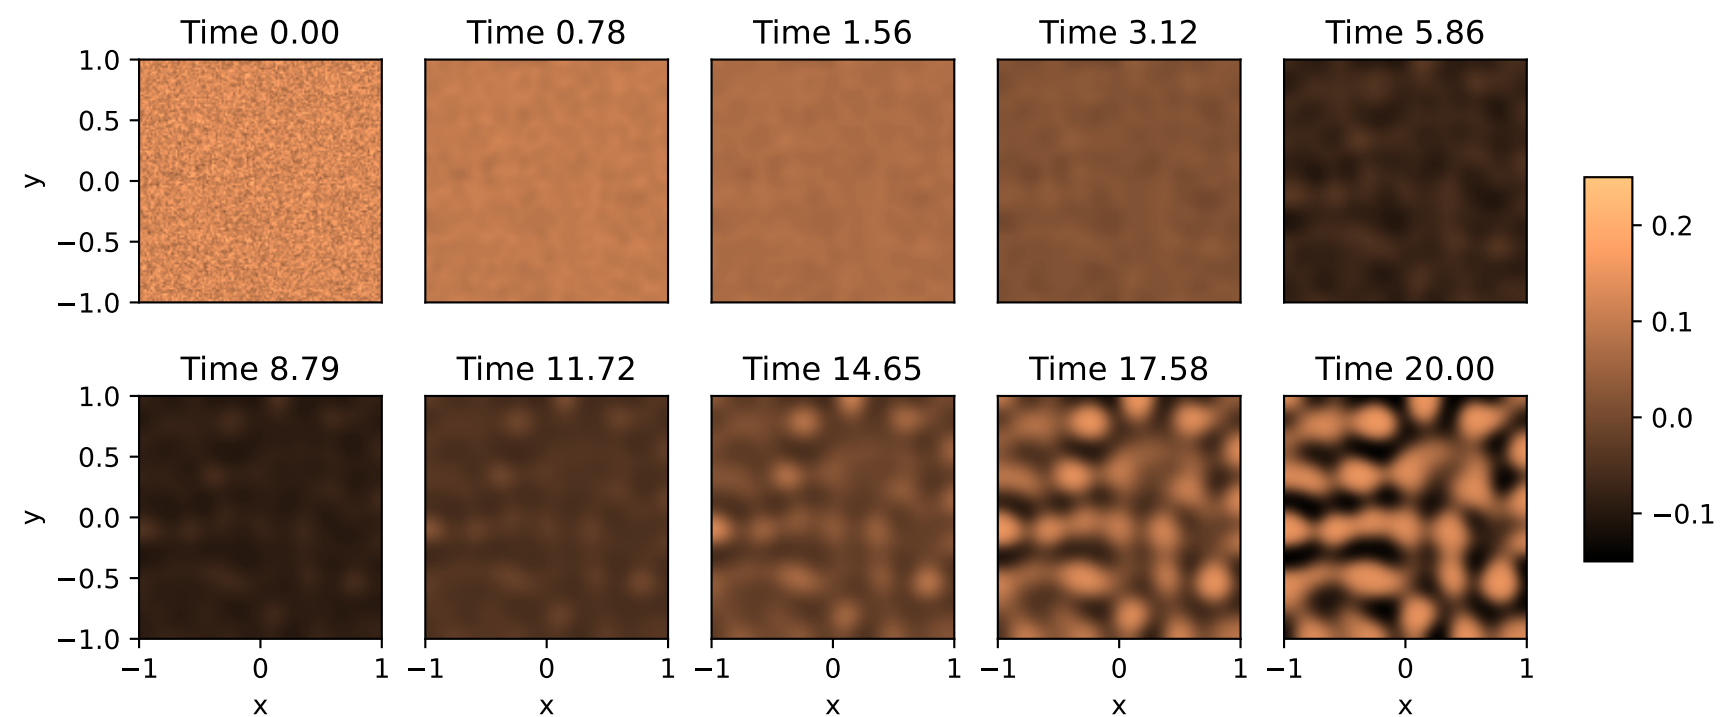

Supplement: supplementary_material [file attachment]

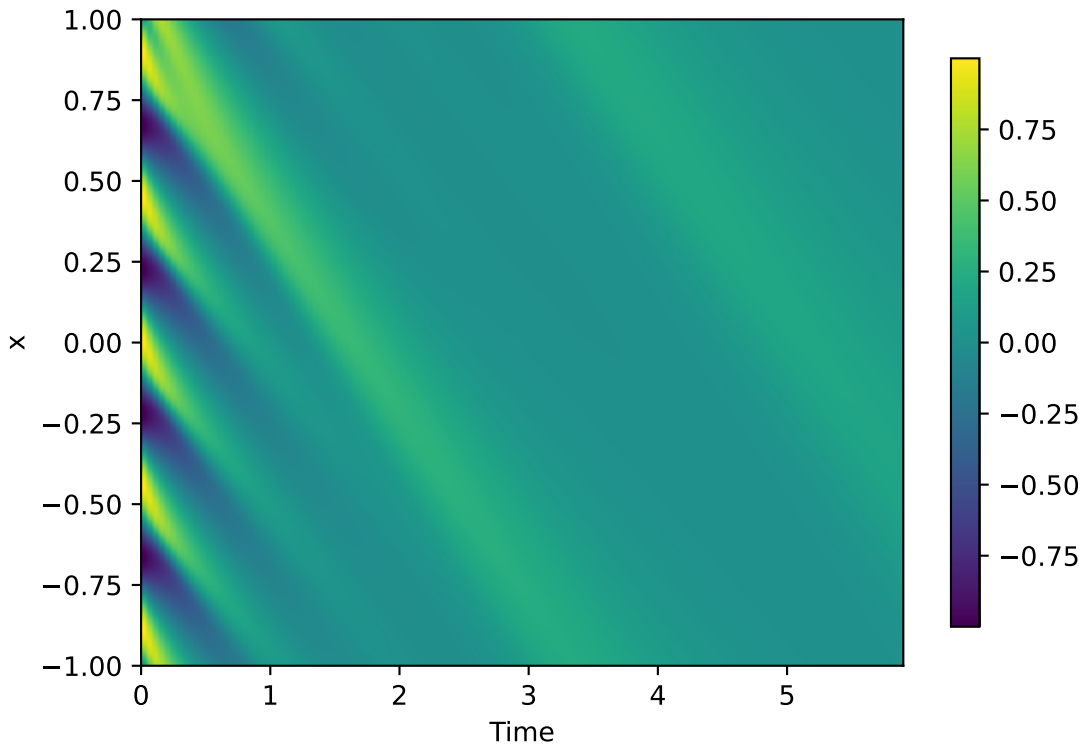

Supplement: supplementary_material [file attachment]

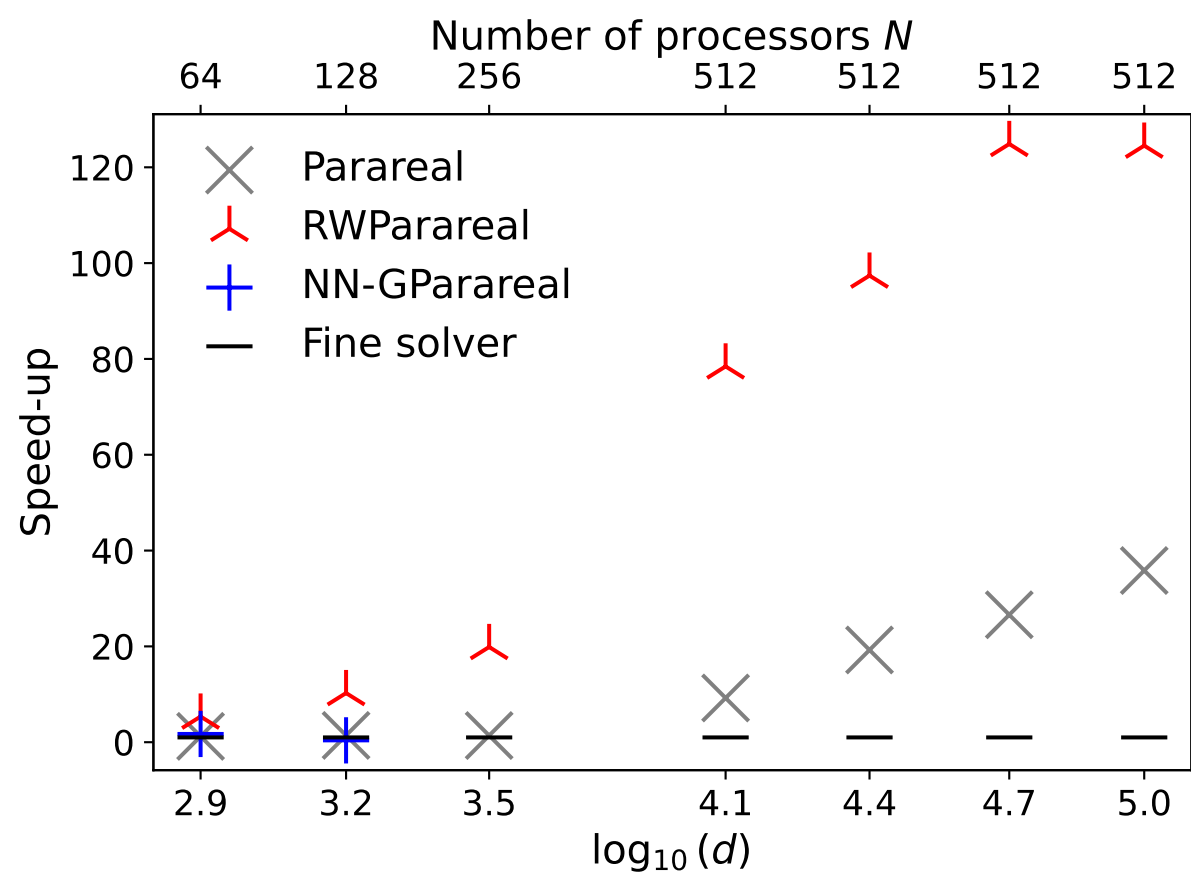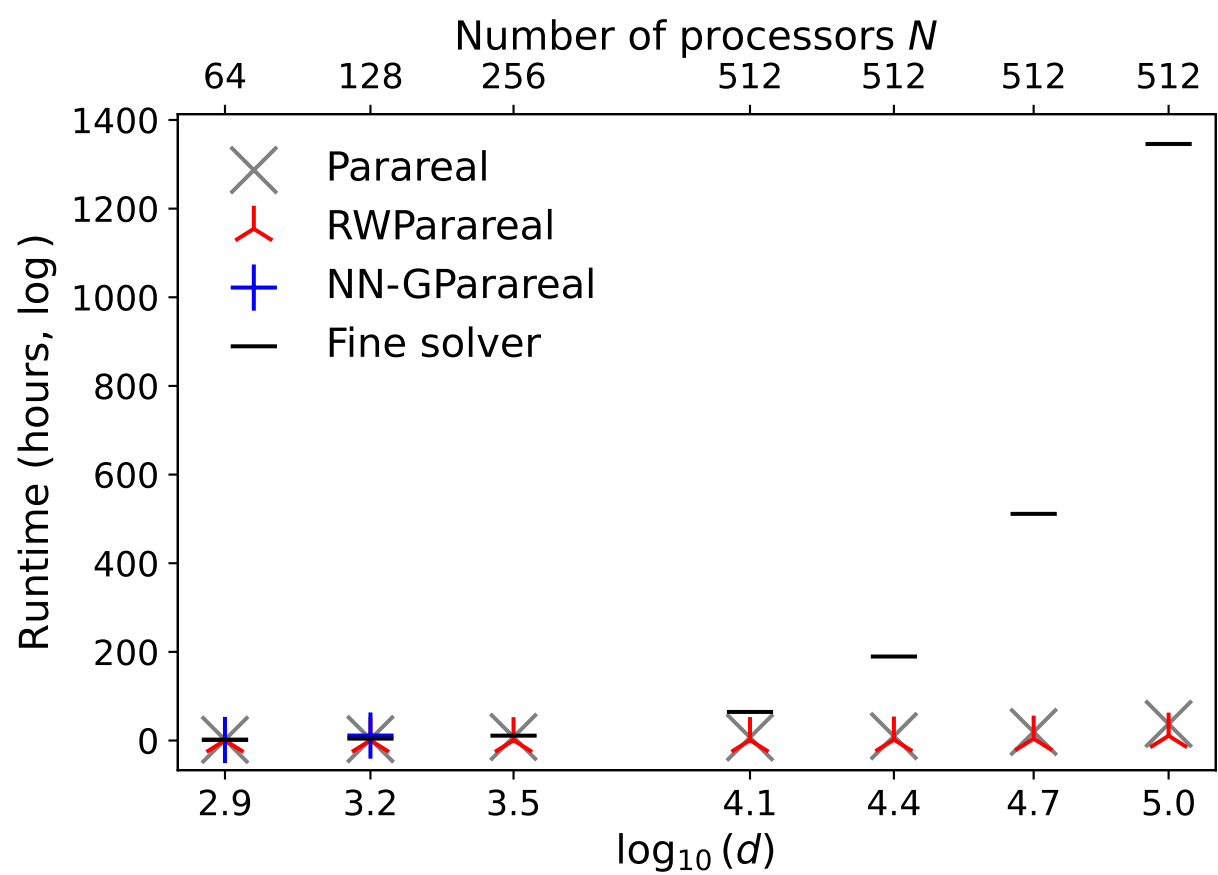

Supplement: supplementary_material [file attachment]

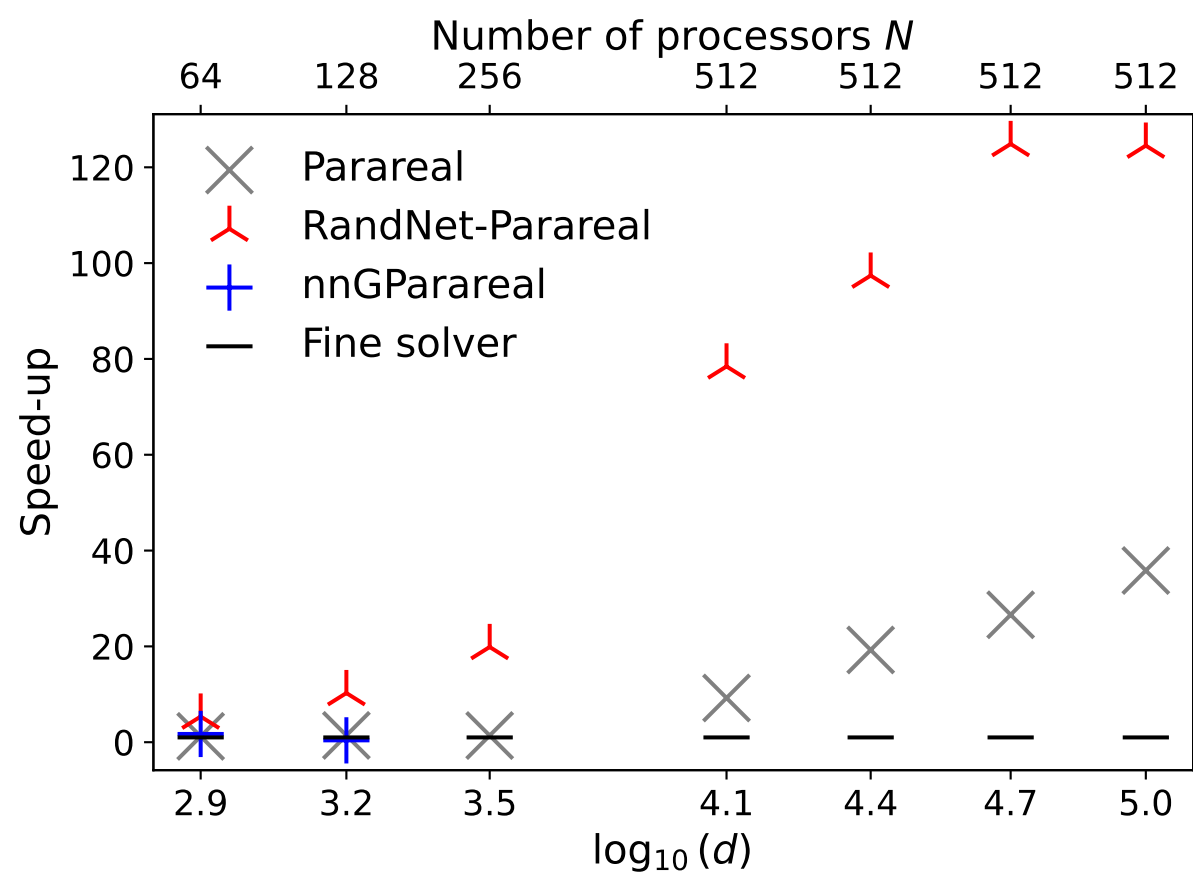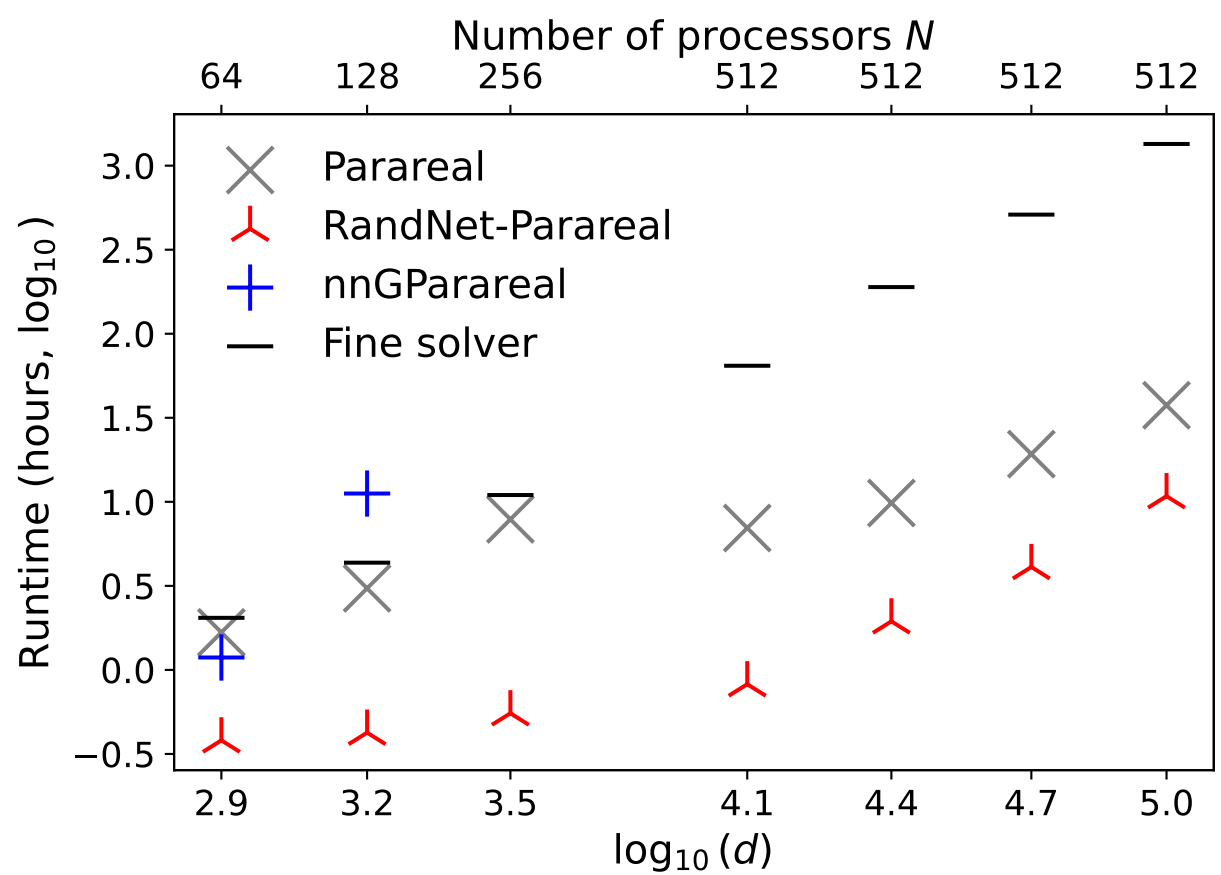

Supplement: supplementary_material [file attachment]

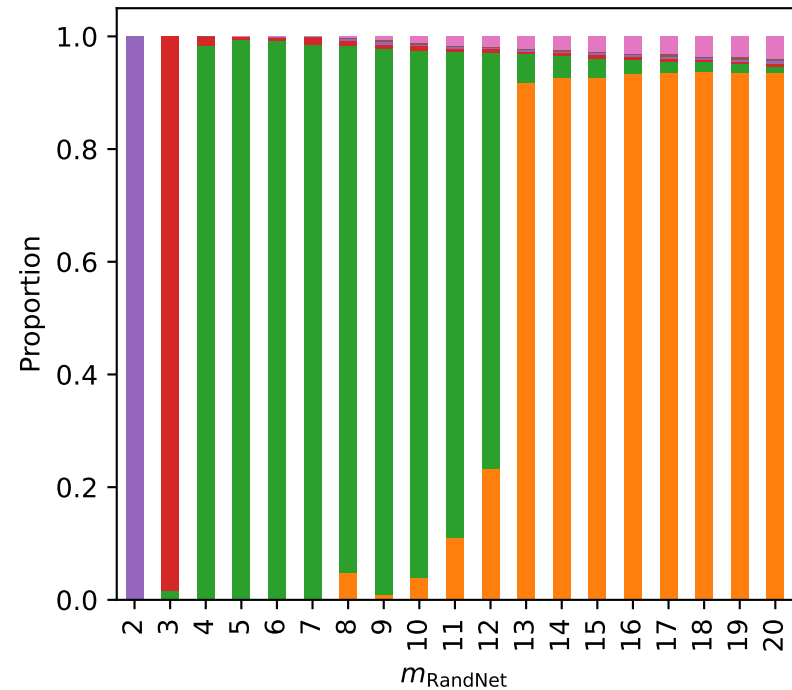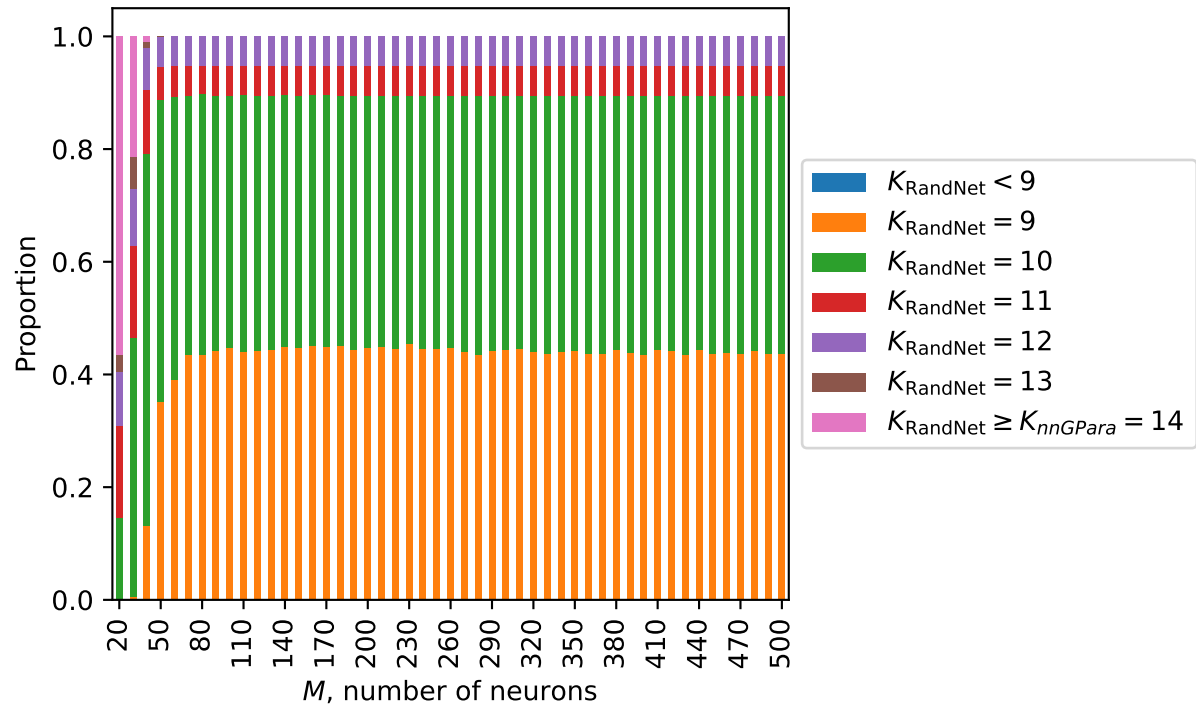

Supplement: supplementary_material [file attachment]

Time 0.00

Time 0.43

Time 0.85

Time 1.28

Time 1.70

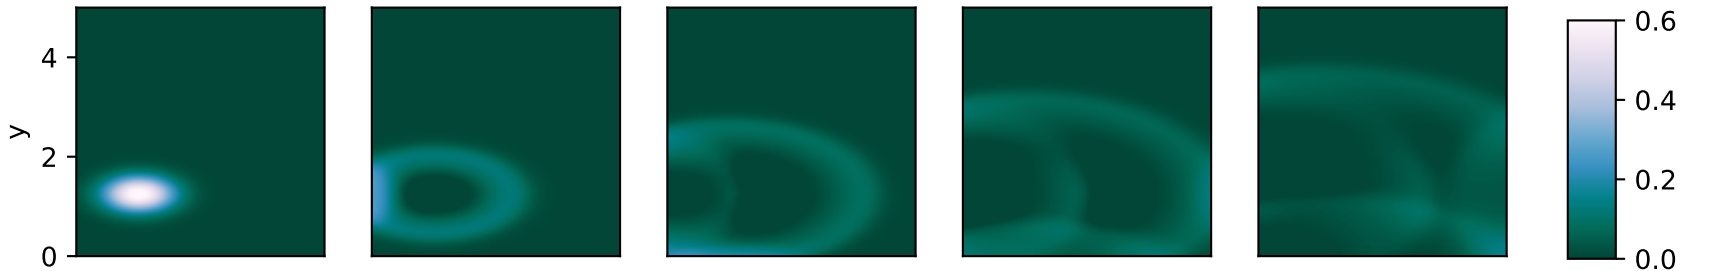

Time 2.55

Time 4.26

Time 8.51

Time 12.77

Time 20.00

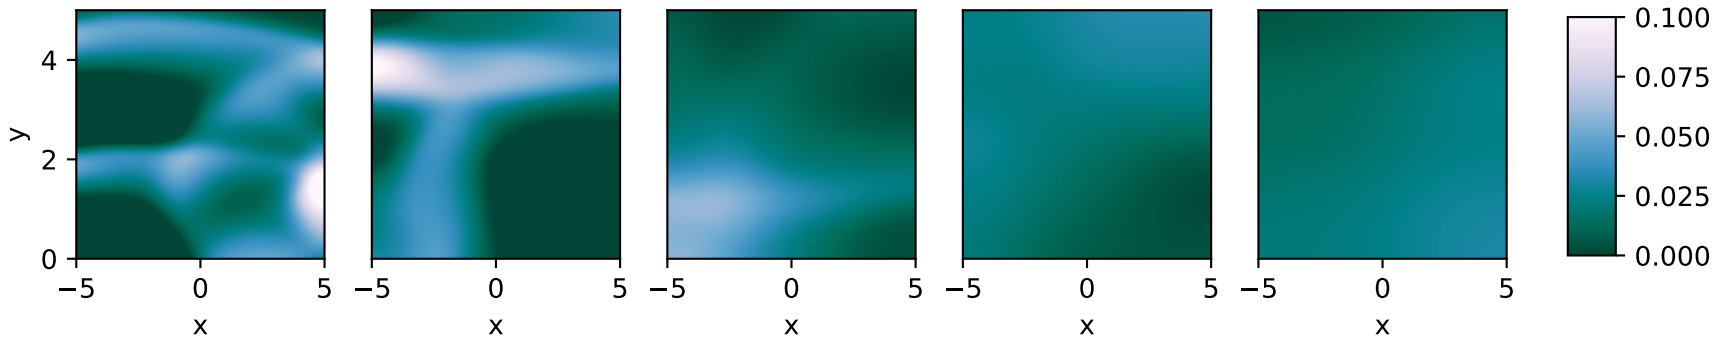

Supplement: supplementary_material [file attachment]
